# Supplementary material for: An environment-friendly approach using deep eutectic solvent combined with liquid–liquid microextraction based on solidification of floating organic droplets for simultaneous determination of preservatives in beverages
Source: Royal Society of Chemistry journal article supplement (doi:10.1039/d2ra07145b), 2023-01-01
Supplement: d2ra07145b1.pdf [file d2ra07145b1.pdf]

## Supplementary Information

An environment-friendly approach by using deep eutectic solvent combined with liquid-liquid microextraction based on solidification of floating organic droplets for simultaneous determination of preservatives in beverages

Jing Zhao <sup>1,2,3</sup>, Lingjun Hou <sup>3</sup>, Longshan Zhao <sup>3</sup>, Liqing Liu <sup>2</sup>, Jianhua Qi <sup>1</sup>, Longhu Wang <sup>1,\*</sup>

<sup>1</sup> School of Pharmacy, Zhejiang University, 866 Yuhangtang Road, 310058, Hangzhou, Zhejiang Province, P.R. China

<sup>2</sup> Zhejiang Weikang Pharmaceutical Company, 15 Xinggong North Road, Jiangshan, 324100, Zhejiang Province, P.R. China

<sup>3</sup> School of Pharmacy, Shenyang Pharmaceutical University, 103 Wenhua Road, 110016, Shenyang, Liaoning Province, P.R. China

**\*Correspondence:** Professor Longhu Wang, School of Pharmacy, Zhejiang University, 866 Yuhangtang Road, 310058, Hangzhou, Zhejiang Province, P.R. China

**E-mail:** wang2000@zju.edu.cn

-

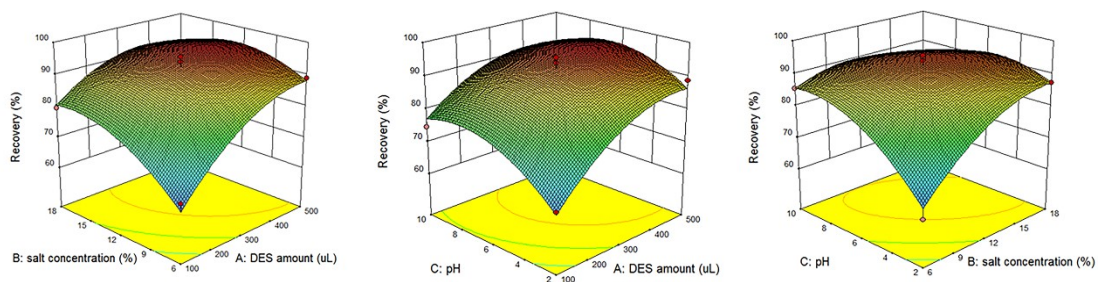

**Fig. S1.** 3D response surface plots showing the effect of three factors on the average recovery of the five target analytes: (A) DES amount ( $\mu\text{L}$ ) vs. salt concentration (%), (B) DES amount ( $\mu\text{L}$ ) vs. pH; salt concentration (%), (C) Salt concentration (%) vs. pH; DES amount ( $\mu\text{L}$ ).

**a**

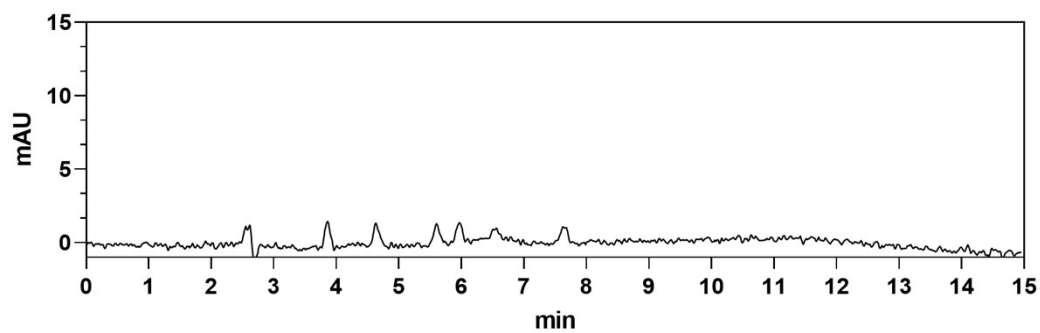

**b**

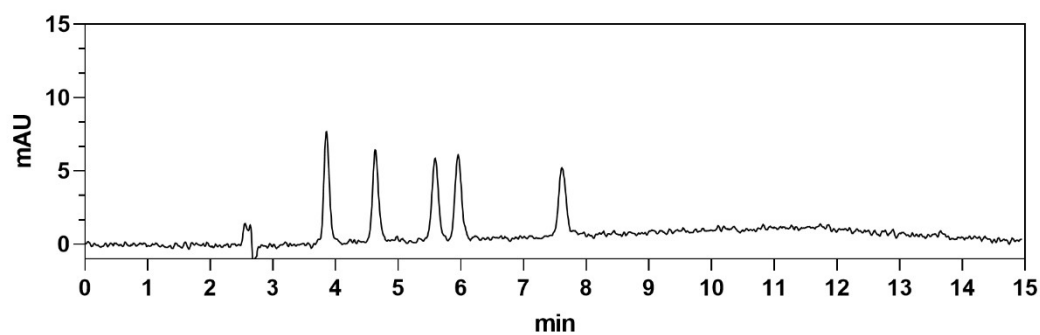

**Fig. S2.** The typical chromatograms of five preservatives at the level of LOD (a), and LOQ (b).

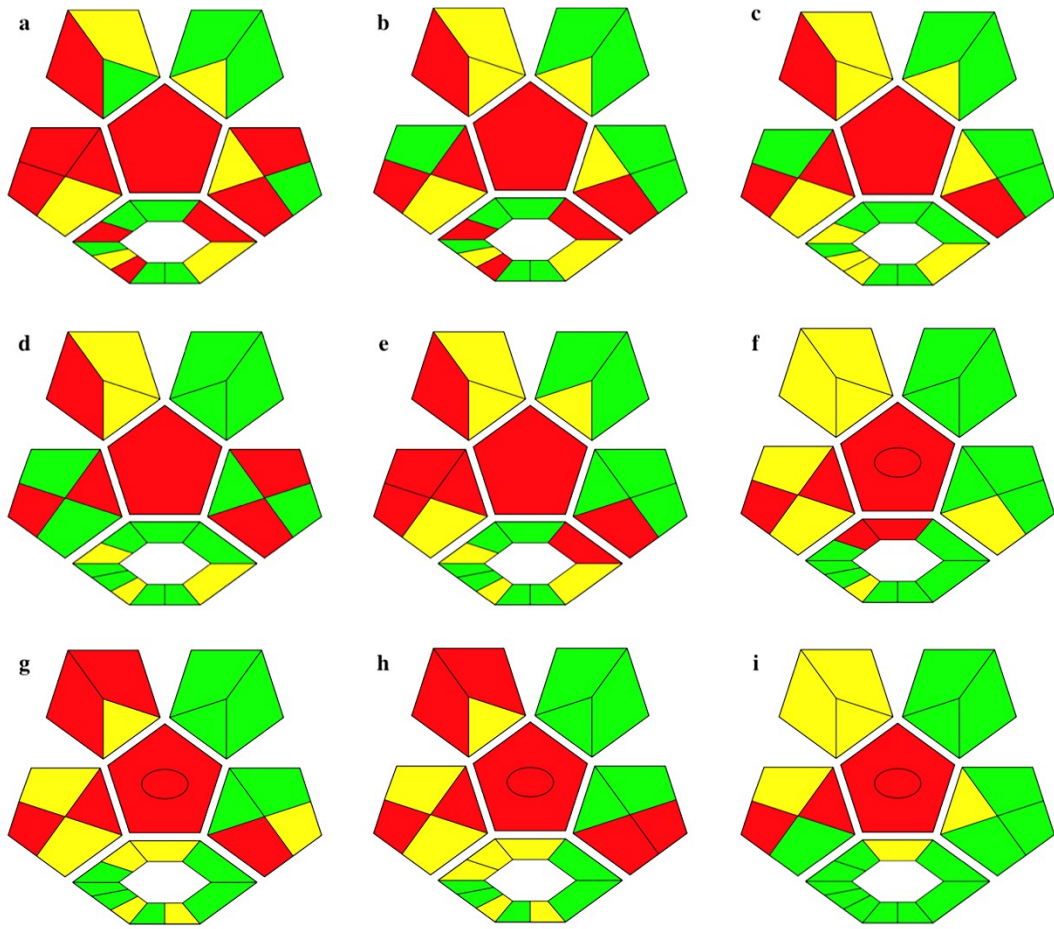

**Fig. S3.** Comparisons with previous reported methods (a: reference 13, b: reference 15, c: reference 16, d: reference 19, e: reference 24, f: reference 47, g: reference 48, h: reference 49, i: current study) using the ComplexGAPI tool.

**Table S1.** Response surface experiment results based on the Box-Behnken design for the average recovery (Y) and three variables ( $X_1$ – $X_3$ )

| <i>Run</i> | Independent variables        |                        |       | Response             |  |
|------------|------------------------------|------------------------|-------|----------------------|--|
|            | $X_1$                        | $X_2$                  | $X_3$ | Y                    |  |
|            | DES amount ( $\mu\text{L}$ ) | Salt concentration (%) | pH    | Average recovery (%) |  |
| 1          | 300                          | 12                     | 6     | 92.0                 |  |
| 2          | 500                          | 12                     | 2     | 88.8                 |  |
| 3          | 300                          | 18                     | 10    | 85.4                 |  |
| 4          | 300                          | 6                      | 10    | 85.5                 |  |
| 5          | 100                          | 6                      | 6     | 65.0                 |  |
| 6          | 300                          | 6                      | 2     | 61.0                 |  |
| 7          | 500                          | 6                      | 6     | 89.0                 |  |
| 8          | 300                          | 12                     | 6     | 95.6                 |  |
| 9          | 300                          | 12                     | 6     | 90.4                 |  |
| 10         | 300                          | 18                     | 2     | 87.4                 |  |
| 11         | 100                          | 12                     | 2     | 64.8                 |  |
| 12         | 100                          | 12                     | 10    | 74.8                 |  |
| 13         | 500                          | 12                     | 10    | 88.8                 |  |
| 14         | 500                          | 18                     | 6     | 87.4                 |  |
| 15         | 300                          | 12                     | 6     | 94.0                 |  |
| 16         | 300                          | 12                     | 6     | 90.4                 |  |
| 17         | 100                          | 18                     | 6     | 79.6                 |  |

**Table S2.** Analysis of variance (ANOVA) for response surface quadratic model

| Source                        | Sum of squares         | Degree of freedom | Mean square | F-value | p-Value (> F) |     |
|-------------------------------|------------------------|-------------------|-------------|---------|---------------|-----|
| Model                         | 1770.30                | 9                 | 196.70      | 20.44   | 0.0003        |     |
| X <sub>1</sub>                | 609.01                 | 1                 | 609.01      | 63.27   | < 0.0001      |     |
| X <sub>2</sub>                | 193.06                 | 1                 | 193.06      | 20.06   | 0.0029        |     |
| X <sub>3</sub>                | 132.03                 | 1                 | 132.03      | 13.72   | 0.0076        |     |
| X <sub>1</sub> X <sub>2</sub> | 65.61                  | 1                 | 65.61       | 6.82    | 0.0349        |     |
| X <sub>1</sub> X <sub>3</sub> | 25.00                  | 1                 | 25.00       | 2.60    | 0.1511        |     |
| X <sub>2</sub> X <sub>3</sub> | 175.56                 | 1                 | 175.56      | 18.24   | 0.0037        |     |
| X <sub>1</sub> <sup>2</sup>   | 171.25                 | 1                 | 171.25      | 17.79   | 0.0039        |     |
| X <sub>2</sub> <sup>2</sup>   | 144.22                 | 1                 | 144.22      | 14.98   | 0.0061        |     |
| X <sub>3</sub> <sup>2</sup>   | 194.84                 | 1                 | 194.84      | 20.24   | 0.0028        |     |
| Residual                      | 67.38                  | 7                 | 9.63        |         |               |     |
| Lack of Pure                  | 46.45                  | 3                 | 15.48       | 2.96    | 0.1609        | not |
| Cor total                     | 1837.67                | 16                | 5.23        |         |               |     |
|                               | R <sup>2</sup> =96.33% | Adj               | C.V.%=3.71% |         |               |     |

**Table S3.** Comparison of proposed method with reported methods for determination of preservatives

| Extraction methods | Matrix                  | Analytes                    | Solvent consumption                                | Extraction Time (min) | Recovery (%) | Ref           |
|--------------------|-------------------------|-----------------------------|----------------------------------------------------|-----------------------|--------------|---------------|
| MSPD               | Sea food                | MP, EP, PP, BP              | 12 mL ACN                                          | 30                    | 75.0-116.1   | 13            |
| DVA MSPD           | Leafy vegetables        | MP, EP, PP, BP, BzP         | 8 mL MeOH                                          | 15                    | 85.0-104.0   | 15            |
| QuEChERS           | Food                    | MP, EP, PP, SA, BA          | 16 ml ACN                                          | 15                    | 91.0-107.0   | 16            |
| DSPE               | Flavors                 | MP, EP, PP, IBP, IPP, BP    | 1 mL ACN                                           | 6                     | 88.3–106.6   | 19            |
| LLME               | Food                    | MP, EP, PP, BP, SA, BA, DHA | 0.5 mL acetone, 0.05 mL trichloromethane           | 25                    | 88.7–110.5   | 24            |
| DLLME              | Water, beverage, beer   | MP, EP, PP                  | 20 $\mu$ L magnetic ionic liquids to 250 mL of ACN | 15                    | 67.5-73.0    | 47            |
| SPME               | Waters and grape juices | PP, IPP, BP, IBP            | ACN:water (40/60)                                  | 15                    | 81.2-88.2    | 48            |
| MSPE               | Water                   | Mp, EP, PP, BzP             | 280 $\mu$ L ACN                                    | 18                    | 72.0-119.0   | 49            |
| LLME-SFO           | Beverages               | MP, EP, PP, IBP, IPP        | 0.3 mL DES                                         | 12                    | 86.0- 110.2  | Current study |

MSPD, matrix solid-phase dispersion

DVA MSPD, double-vortex-assisted matrix solid-phase dispersion

DSPE, dispersive solid-phase extraction

DLLME, dispersive liquid liquid microextraction

SPME, Solid phase microextraction

MPSE, magnetic solid phase extraction

BP, butylparaben

BzP, benzylparaben

SA, sorbic acid;

BA, benzoic acid;

DHA, dehydroacetic acid;

IAP, iso-amyl paraben

AP, amyl paraben

HP, hexyl paraben

HPP, heptyl paraben
